# Supplementary material for: Translating diagnostic assays from the laboratory to the clinic: analytical and clinical metrics for device development and evaluation
Source: Royal Society of Chemistry journal article supplement (doi:10.1039/c6lc00015k), 2016-01-01
Supplement: c6lc00015k1.xlsx [file c6lc00015k1.xlsx]

## Sheet: PPV, NPV, LR calculations
***Input prevalence, diagnostic sensitivity, diagnostic specificity. Calculates predictive values.				***Input pre-test probability, positive, and negative likelihood ratios. Calculates post-test probability
Predictive Value Calculations for Single Prevalence				Post-test probabilities for given likelihood ratios and pre-test probability
Prevalence	Sensitivity	Specificity		Pre-test prob.	LR+	LR–
0.092	0.96	0.99		0.11	83.3	0.75
PPV:	0.906776			Post-test prob (+ test)	0.911469
NPV:	0.995923			Post-test prob (– test)	0.0848329
***Calculates positive and negative likelihood ratios based on sensitivity and specificity entered above
LR+	96
LR–	0.040404

## Sheet: PPV and 1-NPV vs. prevalence
***Input diagnostic sensitivity, diagnostic specificity. Calculates post-test probability of having disease for + test and – test
Sensitivity	Specificity
0.95	0.95

## Sheet: Data
Prevalence	PPV	NPV	1-NPV
0	0	1	0
0.005	0.087156	0.999736	0.00026441
0.01	0.161017	0.999469	0.00053135
0.015	0.224409	0.999199	0.000800854
0.02	0.279412	0.998927	0.00107296
0.025	0.327586	0.998652	0.00134771
0.03	0.37013	0.998375	0.00162514
0.035	0.407975	0.998095	0.00190528
0.04	0.44186	0.997812	0.00218818
0.045	0.472376	0.997526	0.00247389
0.05	0.5	0.997238	0.00276243
0.055	0.525126	0.996946	0.00305386
0.06	0.548077	0.996652	0.00334821
0.065	0.569124	0.996354	0.00364554
0.07	0.588496	0.996054	0.00394589
0.075	0.606383	0.995751	0.00424929
0.08	0.622951	0.995444	0.00455581
0.085	0.63834	0.995135	0.00486548
0.09	0.652672	0.994822	0.00517837
0.095	0.666052	0.994505	0.00549451
0.1	0.678571	0.994186	0.00581395
0.105	0.690311	0.993863	0.00613676
0.11	0.701342	0.993537	0.00646298
0.115	0.711726	0.993207	0.00679268
0.12	0.721519	0.992874	0.00712589
0.125	0.730769	0.992537	0.00746269
0.13	0.739521	0.992197	0.00780312
0.135	0.747813	0.991853	0.00814725
0.14	0.755682	0.991505	0.00849515
0.145	0.763158	0.991153	0.00884686
0.15	0.77027	0.990798	0.00920245
0.155	0.777045	0.990438	0.009562
0.16	0.783505	0.990074	0.00992556
0.165	0.789673	0.989707	0.0102932
0.17	0.795567	0.989335	0.010665
0.175	0.801205	0.988959	0.011041
0.18	0.806604	0.988579	0.0114213
0.185	0.811778	0.988194	0.011806
0.19	0.816742	0.987805	0.0121951
0.195	0.821508	0.987411	0.0125888
0.2	0.826087	0.987013	0.012987
0.205	0.83049	0.98661	0.0133899
0.21	0.834728	0.986202	0.0137976
0.215	0.838809	0.98579	0.0142102
0.22	0.842742	0.985372	0.0146277
0.225	0.846535	0.98495	0.0150502
0.23	0.850195	0.984522	0.0154778
0.235	0.853728	0.984089	0.0159106
0.24	0.857143	0.983651	0.0163488
0.245	0.860444	0.983208	0.0167923
0.25	0.863636	0.982759	0.0172414
0.255	0.866726	0.982304	0.017696
0.26	0.869718	0.981844	0.0181564
0.265	0.872617	0.981377	0.0186226
0.27	0.875427	0.980905	0.0190948
0.275	0.878151	0.980427	0.019573
0.28	0.880795	0.979943	0.0200573
0.285	0.883361	0.979452	0.0205479
0.29	0.885852	0.978955	0.021045
0.295	0.888273	0.978451	0.0215486
0.3	0.890625	0.977941	0.0220588
0.305	0.892912	0.977424	0.0225759
0.31	0.895137	0.9769	0.0230999
0.315	0.897301	0.976369	0.0236309
0.32	0.899408	0.975831	0.0241692
0.325	0.90146	0.975285	0.0247148
0.33	0.903458	0.974732	0.025268
0.335	0.905405	0.974171	0.0258288
0.34	0.907303	0.973602	0.0263975
0.345	0.909154	0.973026	0.0269742
0.35	0.910959	0.972441	0.0275591
0.355	0.91272	0.971848	0.0281523
0.36	0.914439	0.971246	0.028754
0.365	0.916116	0.970636	0.0293644
0.37	0.917755	0.970016	0.0299838
0.375	0.919355	0.969388	0.0306122
0.38	0.920918	0.96875	0.03125
0.385	0.922446	0.968103	0.0318973
0.39	0.92394	0.967446	0.0325543
0.395	0.925401	0.966779	0.0332212
0.4	0.926829	0.966102	0.0338983
0.405	0.928227	0.965414	0.0345858
0.41	0.929594	0.964716	0.035284
0.415	0.930933	0.964007	0.0359931
0.42	0.932243	0.963287	0.0367133
0.425	0.933526	0.962555	0.0374449
0.43	0.934783	0.961812	0.0381883
0.435	0.936014	0.961056	0.0389436
0.44	0.93722	0.960289	0.0397112
0.445	0.938402	0.959509	0.0404914
0.45	0.93956	0.958716	0.0412844
0.455	0.940696	0.957909	0.0420907
0.46	0.94181	0.95709	0.0429104
0.465	0.942903	0.956256	0.0437441
0.47	0.943975	0.955408	0.044592
0.475	0.945026	0.954545	0.0454545
0.48	0.946058	0.953668	0.046332
0.485	0.947071	0.952775	0.0472249
0.49	0.948065	0.951866	0.0481336
0.495	0.949041	0.950942	0.0490585
0.5	0.95	0.95	0.05
0.505	0.950942	0.949041	0.0509586
0.51	0.951866	0.948065	0.0519348
0.515	0.952775	0.947071	0.0529291
0.52	0.953668	0.946058	0.0539419
0.525	0.954545	0.945026	0.0549738
0.53	0.955408	0.943975	0.0560254
0.535	0.956256	0.942903	0.0570971
0.54	0.95709	0.94181	0.0581897
0.545	0.957909	0.940696	0.0593036
0.55	0.958716	0.93956	0.0604396
0.555	0.959509	0.938402	0.0615982
0.56	0.960289	0.93722	0.0627803
0.565	0.961056	0.936014	0.0639864
0.57	0.961812	0.934783	0.0652174
0.575	0.962555	0.933526	0.066474
0.58	0.963287	0.932243	0.067757
0.585	0.964007	0.930933	0.0690673
0.59	0.964716	0.929594	0.0704057
0.595	0.965414	0.928227	0.0717732
0.6	0.966102	0.926829	0.0731707
0.605	0.966779	0.925401	0.0745993
0.61	0.967446	0.92394	0.0760599
0.615	0.968103	0.922446	0.0775536
0.62	0.96875	0.920918	0.0790816
0.625	0.969388	0.919355	0.0806452
0.63	0.970016	0.917755	0.0822454
0.635	0.970636	0.916116	0.0838838
0.64	0.971246	0.914439	0.0855615
0.645	0.971848	0.91272	0.0872801
0.65	0.972441	0.910959	0.0890411
0.655	0.973026	0.909154	0.090846
0.66	0.973602	0.907303	0.0926966
0.665	0.974171	0.905405	0.0945946
0.67	0.974732	0.903458	0.0965418
0.675	0.975285	0.90146	0.0985401
0.68	0.975831	0.899408	0.100592
0.685	0.976369	0.897301	0.102699
0.69	0.9769	0.895137	0.104863
0.695	0.977424	0.892912	0.107088
0.7	0.977941	0.890625	0.109375
0.705	0.978451	0.888273	0.111727
0.71	0.978955	0.885852	0.114148
0.715	0.979452	0.883361	0.116639
0.72	0.979943	0.880795	0.119205
0.725	0.980427	0.878151	0.121849
0.73	0.980905	0.875427	0.124573
0.735	0.981377	0.872617	0.127383
0.74	0.981844	0.869718	0.130282
0.745	0.982304	0.866726	0.133274
0.75	0.982759	0.863636	0.136364
0.755	0.983208	0.860444	0.139556
0.76	0.983651	0.857143	0.142857
0.765	0.984089	0.853728	0.146272
0.77	0.984522	0.850195	0.149805
0.775	0.98495	0.846535	0.153465
0.78	0.985372	0.842742	0.157258
0.785	0.98579	0.838809	0.161191
0.79	0.986202	0.834728	0.165272
0.795	0.98661	0.83049	0.16951
0.8	0.987013	0.826087	0.173913
0.805	0.987411	0.821508	0.178492
0.81	0.987805	0.816742	0.183258
0.815	0.988194	0.811778	0.188222
0.82	0.988579	0.806604	0.193396
0.825	0.988959	0.801205	0.198795
0.83	0.989335	0.795567	0.204433
0.835	0.989707	0.789673	0.210327
0.84	0.990074	0.783505	0.216495
0.845	0.990438	0.777045	0.222955
0.85	0.990798	0.77027	0.22973
0.855	0.991153	0.763158	0.236842
0.86	0.991505	0.755682	0.244318
0.865	0.991853	0.747813	0.252187
0.87	0.992197	0.739521	0.260479
0.875	0.992537	0.730769	0.269231
0.88	0.992874	0.721519	0.278481
0.885	0.993207	0.711726	0.288274
0.89	0.993537	0.701342	0.298658
0.895	0.993863	0.690311	0.309689
0.9	0.994186	0.678571	0.321429
0.905	0.994505	0.666052	0.333948
0.91	0.994822	0.652672	0.347328
0.915	0.995135	0.63834	0.36166
0.92	0.995444	0.622951	0.377049
0.925	0.995751	0.606383	0.393617
0.93	0.996054	0.588496	0.411504
0.935	0.996354	0.569124	0.430876
0.94	0.996652	0.548077	0.451923
0.945	0.996946	0.525126	0.474874
0.95	0.997238	0.5	0.5
0.955	0.997526	0.472376	0.527624
0.96	0.997812	0.44186	0.55814
0.965	0.998095	0.407975	0.592025
0.97	0.998375	0.37013	0.62987
0.975	0.998652	0.327586	0.672414
0.98	0.998927	0.279412	0.720588
0.985	0.999199	0.224409	0.775591
0.99	0.999469	0.161017	0.838983
0.995	0.999736	0.087156	0.912844
1	1	0	1
